# Supplementary material for: Screening for broad-spectrum antimicrobial endophytes from Rosa roxburghii and multi-omic analyses of biosynthetic capacity
Source: Front Plant Sci. 2022 Nov 16;13:1060478. doi: 10.3389/fpls.2022.1060478 (PMC9709285; doi:10.3389/fpls.2022.1060478)
Supplement: Supplementary file 9 [file Table_5.xlsx]

## Sheet: Supplemental Table S5
NO.	Compound Name	CAS/CID	rtmin	mz	References for antimicrobial activity
1	.beta.-Citronellol	106-22-9	123.73	198.184	Kotan et al.,2007; Moein et al.,2017
2	(-)-catechin gallate	130405-40-2	184.816	443.093	Kawashima et al.,2011
3	(-)-norephedrine	492-41-1	221.223	152.106	Tamizh et al., 2012
4	(-)-riboflavin	83-88-5	204.526	377.142	Kim et al., 2021; Farah et al., 2022
5	(+)-camphor	464-49-3	137.037	135.115	Anjaneyulu et al., 2021
6	(+)-trans-chrysanthemic acid	4638-92-0	176.434	151.121	Mladineo et al., 2021
7	(S)-(-)-Citronellic acid	2111-53-7	147.528	212.163	Winkler et al., 2014; Elmosallamy et al., 2021
8	1-hydroxy-2-naphthoic acid	86-48-6	206.958	189.053	Ahmed et al., 2019
9	1-Oleoyl-sn-glycero-3-phosphocholine	19420-56-5	158.547	544.336	Riessberger-Gallé et al., 2016
10	1-phenylethanol	98-85-1	34.814	105.069	Chanysheva et al., 2016
11	1,2-benzenedicarboxylic acid	88-99-3	163.783	167.044	Fadipe, et al., 2014
12	2-aminobenzamide	88-68-6	44.8935	137.069	Pokharkar Raghunath et al., 2008
13	2-aminobenzimidazole	934-32-7	204.373	134.095	Seth et al., 2003; Huigens et al., 2010
14	2-hydroxybenzyl alcohol	90-01-7	92.227	107.048	Choi et al., 2012
15	2'-hydroxy-4'-methoxyacetophenone	552-41-0	28.795	167.068	Mimura et al., 1981
16	25-hydroxyvitamin D3	19356-17-3	33.511	365.314	Wang et al., 2013
17	3-amino-2,3-dihydrobenzoic acid	59556-18-2	66.357	140.069	Osman et al., 2021
18	3-hexen-1-ol, (z)-	928-96-1	173.3	83.0845	Archbold et al., 1997
19	3-hydroxy-8-methoxy-3-methyl-2,4-dihydrobenzo[a]anthracene-1,7,12-trione	117620-87-8	159.501	337.087	Gilpin et al., 1989
20	4-aminoantipyrine	83-07-8	245.441	159.09	Vaghasiya et al., 2004
21	5-Aminolevulinic acid	106-60-5	148.487	132.064	Harris et al., 2012; Shi et al., 2016
22	5-methoxytryptamine	608-07-1	197.313	174.101	Wang et al., 2002
23	6-methylcoumarin	92-48-8	92.297	161.08	Yang et al., 2021
24	Aloesin	30861-27-9	438.139	359.122	Añibarro-Ortega et al., 2021
25	Amikacin	37517-28-5	285.357	608.267	Montgomery et al., 2014
26	Amygdalin	29883-15-6	389.523	480.165	Al-Bakri et al., 2010
27	Astragalin	480-10-4	403.276	471.091	Ivanov et al., 2020
28	Atovaquone	95233-18-4	402.133	367.119	Carter-Timofte et al., 2021
29	Azadirachtin a	11141-17-6	200.373	567.175	Sarawaneeyaruk et al., 2015
30	Benzamide	55-21-0	112.758	121.049	Yang et al., 2015
31	Berberine	2086-83-1	252.739	337.144	Čerňáková et al., 2002
32	Bergenin	477-90-7	243.59	329.082	Nazir et al., 2011; Raj et al., 2012
33	Betaine	107-43-7	270.295	118.086	Machuca et al., 2019
34	Calcimycin	52665-69-7	479.576	488.254	Kayathi et al., 2018
35	Candesartan cilexetil	145040-37-5	237.362	611.245	Xu et al., 2021
36	Cefoperazone	62893-19-0	380.226	668.146	Brogden et al., 1981
37	Celecoxib	169590-42-5	207.323	382.108	Montrose et al., 2016
38	Chlorhexidine	55-56-1	396.147	488.169	Vianna et al., 2004
39	Ciprofloxacin	85721-33-1	130.373	314.122	Chalkley et al., 1985
40	Clindamycin	18323-44-9	152.207	425.21	Kasten 1999
41	Coumarin	91-64-5	57.736	147.043	Ojala et al., 2000
42	Dapsone	80-08-0	415.888	497.146	Paquet et al., 2004
43	Diacetyl	431-03-8	194.403	87.043	Lanciotti et al., 2003
44	Dibutyl phthalate	84-74-2	30.3445	279.157	Khatiwora et al., 2012
45	Diosmin	520-27-4	300.24	631.18	Kilit et al., 2021
46	Eicosapentaenoic acid	10417-94-4	51.003	303.231	Shin et al., 2007
47	Epoxiconazole	135319-73-2	440.59	330.092	Abdelghany et al., 2020
48	Flindersine	523-64-8	167.298	228.083	Duraipandiyan et al., 2009
49	Flurbiprofen	5104-49-4	408.852	245.077	Hersh et al., 1991
50	Fluticasone propionate	80474-14-2	410.586	523.17	Liu et al., 2010
51	Fraxetin	574-84-5	342.876	209.055	Wang et al., 2014
52	Furametpyr	123572-88-3	250.595	290.101	Busic et al., 2019
53	Gamabufotalin	465-11-2	103.9	403.242	Stefanowicz-Hajduk et al., 2020
54	Gambogic acid	2752-65-0	134.827	629.31	Jang et al., 2016
55	Geldanamycin	30562-34-6	203.573	583.268	Anansiriwattana et al., 2006
56	Geniposidic acid	27741-01-1	302.749	397.099	Lou et al., 2011
57	Glucosamine	3416-24-8	253.1	202.067	Malik et al., 2013
58	Glutaraldehyde	111-30-8	119.932	123.043	Gorman et al., 1980
59	Juglone	481-39-0	234.837	175.056	Clark et al., 1990
60	L-carnitine	541-15-1	364.963	162.112	Olgun et al., 2004
61	Lincomycin	154-21-2	211.488	429.207	Inouye et al., 1989
62	Loganin	18524-94-2	397.401	413.137	Zhao et al., 2014
63	Mangostine	6147-11-1	294.34	411.18	Kaomongkolgit et al., 2009
64	Meperidine	57-42-1	105.686	174.111	Lagadinou et al., 2020
65	Metronidazole	443-48-1	357.024	128.069	Tally et al.,1978
66	Naproxen	22204-53-1	276.67	231.077	Han et al., 2020
67	Nevadensin	10176-66-6	293.777	345.113	Brahmachari 2010
68	Nicotinamide	98-92-0	59.6725	123.058	Murray 2003
69	Nicotine	54-11-5	80.331	163.122	Pavia and Plummer 2020
70	Nobiletin	478-01-3	223.993	403.155	Yao et al., 2012
71	Norfloxacin	70458-96-7	385.224	320.143	Chierentin and Salgado 2016
72	Orientin	28608-75-5	136.949	449.104	Ali and Dixit 2012
73	Osajin	482-53-1	90.0275	349.104	Mahmoud 1981
74	Patulin	149-29-1	133.427	155.032	Paytubi et al., 2017
75	Phenyllactic acid	515-30-0	263.8	167.047	Lavermicocca et al., 2003; Ning et al., 2017
76	Phytosphingosine	554-62-1	163.735	318.299	Raizner et al., 2022
77	Picolinic acid	98-98-6	59.123	106.027	Borawska et al., 2008
78	Pioglitazone	111025-46-8	236.801	357.104	Masadeh et al., 2011
79	Pirimicarb	23103-98-2	260.145	239.137	Divya et al., 2018
80	Polygodial	6754-20-7	34.385	119.084	Kubo et al., 2005
81	Pristimerin	1258-84-0	182.065	487.277	Gullo et al., 2012
82	Procyanidin b2	29106-49-8	297.328	579.147	Huang et al., 2022
83	Resveratrol	501-36-0	54.022	211.058	Paulo et al., 2010
84	Tetrandrine	518-34-3	233.262	623.31	Lee et al., 2012
85	Thymoquinone	490-91-5	78.611	165.074	Wang et al., 2021a
86	Tigecycline	220620-09-7	196.185	569.252	Sader et al., 2016
87	Trans-cinnamic acid	140-10-3	253.429	131.048	Yilmaz and Ergün 2018
88	Vulpinic acid	521-52-8	595.079	360.983	Cansaran et al., 2007
89	Zerumbone	471-05-6	33.521	161.131	Abdul et al., 2008
90	2-heptyl-4-hydroxyquinoline n-oxide	341-88-8	172.693	144.045	Machan et al., 1992
91	2,3-dihydroxybenzoic acid	303-38-8	286.819	152.995	Pj et al., 2010
92	2'-fucosyllactose	16219342	439.096	601.175	Mortaz et al., 2022
93	3-hydroxyanthranilic acid	548-93-6	233.013	152.035	Narui et al., 2009
94	3-hydroxybenzaldehyde	100-83-4	33.515	121.03	Esmaeili and Kakavand 2017
95	Acetoacetic acid	541-50-4	293.742	101.024	In et al., 2013
96	Anethole	104-46-1	155.979	147.065	Fujita
97	Arachidonic acid	506-32-1	36.462	303.231	Beavers et al., 2019
98	Astilbin	29838-67-3	31.917	449.086	Sharma et al., 2020
99	Baicalin	21967-41-9	299.122	445.075	Ozma et al., 2021
100	Gentisaldehyde	1194-98-5	39.094	137.024	Schabauer et al., 2018
101	Gentisic acid	490-79-9	55.803	153.019	Abedi et al., 2020
102	Glycodeoxycholic acid	360-65-6	196.578	448.304	Wang et al., 2021b
103	Gossypin	652-78-8	418.097	479.103	Chamundeeswari et al., 2007
104	Gossypol	303-45-7	414.802	499.174	Hron et al., 1987
105	Hydroquinone	123-31-9	57.719	109.029	Ma et al., 2019
106	Hydroxyisocaproic acid	13748-90-8	158.139	131.07	Sakko et al., 2014
107	Hymeglusin	29066-42-0	25.988	323.166	Skaff et al., 2012
108	Hypericin	548-04-9	142.511	503.076	Feyzioğlu et al., 2013
109	Hypocrellin a	77029-83-5	478.944	545.17	Ma et al., 2004
110	Indolelactic acid	1821-52-9	132.848	158.061	Szawarski et al., 2020
111	Jasplakinolide	102396-24-7	503.034	707.223	Scott et al., 1988
112	Kendomycin	183202-73-5	25.368	485.278	Elnakady et al., 2016
113	Kojic acid	501-30-4	131.132	141.016	Nurunnabi et al., 2018
114	Naringenin	480-41-1	412.629	271.054	Cheon et al., 1995
115	Ostruthin	148-83-4	25.988	297.152	Mokdad-Bzeouich et al., 2015
116	Phloretin	60-82-2	50.955	273.063	Barreca et al., 2014
117	Rutin	153-18-4	370.083	609.167	Rym et al., 1996
118	Salicylic acid	69-72-7	159.368	137.024	da Rocha Neto et al., 2015
119	Valeric acid	109-52-4	97.183	101.06	Kovanda et al., 2019
120	Vanillic acid	121-34-6	163.462	152.034	Qian et al., 2020
References
Abdelghany, T. M., Hassan, M. M., El-Naggar, M. A., Abd El-Mongy, M. GC/MS analysis of Juniperus procera extract and its activity with silver nanoparticles against Aspergillus flavus growth and aflatoxins production. Biotechnology Reports, 2020, 27, e00496.
Abedi, F., Razavi, B. M., Hosseinzadeh, H. A review on gentisic acid as a plant derived phenolic acid and metabolite of aspirin: Comprehensive pharmacology, toxicology, and some pharmaceutical aspects. Phytotherapy research, 2020, 34(4), 729-741.
Abdul, A. B., Abdelwahab, S. I., Al-Zubairi, A. S., Elhassan, M. M., Murali, S. M. Anticancer and antimicrobial activities of zerumbone from the rhizomes of Zingiber zerumbut. IJP-International Journal of Pharmacology, 2008, 4(4), 301-304.
Ahmed, A. G., Shoukry, E. M., Mostafa, M. M. Synthesis and Characterization of Binary Chelates Derived from 1-Hydroxy-2-Naphthoic (L1) and 2-Hydroxy-1-Naphthoic (L2) Acids with Some Metal Ions by Tribochemical Reactions and Its Application as Anticancer. 2019.
Al-Bakri, S. A., Nima, Z. A., Jabri, R. R., Ajeel, E. A. A. Antibacterial activity of apricot kernel extract containing Amygdalin. Iraqi J. Sci, 2010, 51: 571-576.
Ali, H., Dixit, S. In vitro antimicrobial activity of flavanoids of Ocimum sanctum with synergistic effect of their combined form. Asian Pacific Journal of Tropical Disease, 2012, 2, S396-S398.
Anansiriwattana, W., Tanasupawat, S., Amnuoypol, S., Suwanborirux, K. Identification and antimicrobial activities of actinomycetes from soils in Samed Island, and geldanamycin from strain PC4-3. Thai J Pharm Sci, 2006, 30, 49-56.
Añibarro-Ortega, M., Pinela, J., Ćirić, A., Lopes, E., Molina, A. K., Calhelha, R. C., et al. Extraction of aloesin from Aloe vera rind using alternative green solvents: Process optimization and biological activity assessment. Biology, 2021, 10, 951.
Anjaneyulu, B., Saini, N. A Study on Camphor Derivatives and Its Applications: A Review. Current Organic Chemistry, 2021, 25, 1404-1428.
Archbold, D. D., Hamilton-Kemp, T. R., Barth, M. M., Langlois, B. E. Identifying natural volatile compounds that control gray mold (Botrytis cinerea) during postharvest storage of strawberry, blackberry, and grape. Journal of Agricultural and Food Chemistry, 1997, 45, 4032-4037.
Barreca, D., Bellocco, E., Laganà, G., Ginestra, G., Bisignano, C. Biochemical and antimicrobial activity of phloretin and its glycosilated derivatives present in apple and kumquat. Food chemistry, 2014, 160, 292-297.
Beavers, W. N., Monteith, A. J., Amarnath, V., Mernaugh, R. L., Roberts, L. J., Chazin, W. J., et al. Arachidonic acid kills Staphylococcus aureus through a lipid peroxidation mechanism. Mbio, 2019, 10(5), e01333-19.
Borawska, M. H., Czechowska, S. K., Markiewicz, R., Palka, J., Swislocka, R., Lewandowski, W. Antimicrobial activity and cytotoxicity of picolinic acid and selected picolinates as new potential food preservatives. Polish journal of food and nutrition sciences, 2008, 58(4).
Brahmachari, G. Nevadensin: Isolation, chemistry and bioactivity. International Journal of Green Pharmacy (IJGP), 2010, 4(4).
Brogden, R. N., Carmine, A., Heel, R. C., Morley, P. A., Speight, T. M., Avery, G. S. Cefoperazone: A review of its in vitro antimicrobial activity, pharmacological properties and therapeutic efficacy. Drugs, 1981, 22(6), 423-460.
Busic, V., Vrandecic, K., Siber, T., Roca, S., Gaso-Sokac, D. A rapid microwave induced synthesis of isonicotinamide derivatives and their antifungal activity. Croatica Chemica Acta, 2019, 92(1), 125-136.
Cansaran, D., Atakol, O., Halici, M. G., Aksoy, A. HPLC Analysis of Usnic Acid in Some Ramalina. Species from Anatolia and Investigation of their Antimicrobial Activities. Pharmaceutical Biology, 2007, 45(1), 77-81.
Carter-Timofte, M. E., Arulanandam, R., Kurmasheva, N., Fu, K., Laroche, G., Taha, Z., et al. Antiviral potential of the antimicrobial drug atovaquone against SARS-CoV-2 and emerging variants of concern. ACS infectious diseases, 2021, 7, 3034-3051.
Čerňáková, M., Košťálová, D. Antimicrobial activity of berberine—A constituent ofMahonia aquifolium. Folia microbiologica, 2002, 47, 375-378.
Chalkley, L. J., Koornhof, H. J. Antimicrobial activity of ciprofloxacin against Pseudomonas aeruginosa, Escherichia coli, and Staphylococcus aureus determined by the killing curve method: antibiotic comparisons and synergistic interactions. Antimicrobial agents and chemotherapy, 1985, 28(2), 331-342.
Chamundeeswari, D., Sukumar, E., Amar, K., Reddy, N. B., Kumar, I. A., Chowdry, B. V., Samatha, K. Cytotoxic and Antibacterial Activities of Gossypin. Natural Product Sciences, 2007, 13(4), 300-303.
Chanysheva, A. R., Yunusova, G. V., Vorobyova, T. E., Zorin, V. V. Enantioselective synthesis of (S)-1-phenylethanol, a precursor to low-molecular-weight bioregulators. Russian journal of general chemistry, 2016, 86, 3021-3024.
Cheon, J. H., Lee, S. O., Rym, K. H., Eo, S. K., Lee, C. K., Han, S. S. Antimicrobial Activity of Elfvingia applanata Extract Alone and in Combination with Naringenin. The Korean Journal of Mycology, 1995, 23(2), 153-160.
Chierentin, L., Salgado, H. R. N. Review of properties and analytical methods for the determination of norfloxacin. Critical Reviews in Analytical Chemistry, 2016, 46(1), 22-39.
Choi, H. J., Kim, D. W., Choi, Y. W., Lee, Y. G., Lee, Y. I., Jeong, Y. K., Joo, W. H. Broad-spectrum In vitro antimicrobial activities of Streptomyces sp. strain BCNU 1001. Biotechnology and Bioprocess Engineering, 2012, 17, 576-583.
Clark, A. M., Jurgens, T. M., Hufford, C. D. Antimicrobial activity of juglone. Phytotherapy Research, 1990, 4(1), 11-14.
da Rocha Neto, A. C., Maraschin, M., Di Piero, R. M. Antifungal activity of salicylic acid against Penicillium expansum and its possible mechanisms of action. International journal of food microbiology, 2015, 215, 64-70.
Divya, P., Muthuraja, P., Dhandapani, M., Jothy, V. B. Pesticidal compound Pirimicarb: Spectral analysis, DFT computations, molecular docking study and in vitro bioactivity. Chemical Physics Letters, 2018, 706, 295-302.
Duraipandiyan, V., Ignacimuthu, S. Antibacterial and antifungal activity of Flindersine isolated from the traditional medicinal plant, Toddalia asiatica (L.) Lam. Journal of ethnopharmacology, 2009, 123(3), 494-498.
Elmosallamy, A., Eltawil, N., Ibrahim, S., Hussein, S. A. A. Phenolic Profile: Antimicrobial Activity and Antioxidant Capacity of Colocasia esculenta (L.) Schott. Egyptian Journal of Chemistry, 2021, 64, 2165-2172.
Elnakady, Y. a., Chatterjee, I., Bischoff, M., Rohde, M., Josten, M., Sahl, H. G., et al. Investigations to the antibacterial mechanism of action of kendomycin. PLoS One, 2016, 11(1), e0146165.
Esmaeili, A., Kakavand, S. Antioxidant and antibacterial activity evaluation of 3‐hydroxybenzaldehyde: the product of thymol oxidation by a new magnetic nanocatalyst. IET Nanobiotechnology, 2017, 11(6), 630-636.
Fadipe, L. A., Haruna, A. K., Mohammed, I. Antibacterial activity of 1, 2-benzenedicarboxylic acid, dioctyl ester isolated from the ethyl acetate soluble sub-portion of the unripe fruits of Nauclea latifolia. Int. J. Pure App. Biosci. 2014, 2 : 223-230.
Farah, N., Chin, V. K., Chong, P. P., Lim, W. F., Lim, C. W., Basir, R., et al. Riboflavin as a promising antimicrobial agent? A multi-perspective review. Current Research in Microbial Sciences, 2022, 100111.
Feyzioğlu, B., Demircili, M. E., Özdemir, M., Doğan, M., Baykan, M., Baysal, B. Antibacterial effect of hypericin. Afr J Microbiol Res, 2013, 7(11), 979-982.
Fujita, K. I., Fujita, T., Kubo, I. Anethole, a potential antimicrobial synergist, converts a fungistatic dodecanol to a fungicidal agent. Phytotherapy Research: An International Journal Devoted to Pharmacological and Toxicological Evaluation of Natural Product Derivatives, 2007, 21(1), 47-51.
Gilpin, M. L., Balchin, J., Box, S. J., Tyler, J. W. MM 47755, a new benz [a] anthracene antibiotic from a Streptomycete. The Journal of Antibiotics, 1989, 42, 627-628.
Gorman, S. P., Scott, E. M., Russele, A. D. Antimicrobial activity, uses and mechanisms of action of glutaraldehyde. Journal of Applied Bacteriology, 1980, 48(2), 161-190.
Gullo, F. P., Sardi, J. C., Santos, V. A., Sangalli-Leite, F., Pitangui, N. S., Rossi, S. A., et al. Antifungal activity of maytenin and pristimerin. Evidence-Based Complementary and Alternative Medicine, 2012.
Han, M. İ., Küçükgüzel, Ş. G. Anticancer and antimicrobial activities of naproxen and naproxen derivatives. Mini reviews in medicinal chemistry, 2020, 20(13), 1300-1310.
Harris, F., Pierpoint, L. Photodynamic therapy based on 5‐aminolevulinic acid and its use as an antimicrobial Agent. Medicinal research reviews, 2012, 32, 1292-1327.
Hersh, E. V., Hammond, B. F., Fleury, A. A. Antimicrobial activity of flurbiprofen and ibuprofen in vitro against six common periodontal pathogens. The Journal of clinical dentistry, 1991, 3(1), 1-5.
Huang, L., Yang, K. P., Zhao, Q., Li, H. J., Wang, J. Y., Wu, Y. C. Corrosion resistance and antibacterial activity of procyanidin B2 as a novel environment-friendly inhibitor for Q235 steel in 1 M HCl solution. Bioelectrochemistry, 2022, 143, 107969.
Huigens III, R. W., Reyes, S., Reed, C. S., Bunders, C., Rogers, S. A., Steinhauer, A. T., Melander, C. The chemical synthesis and antibiotic activity of a diverse library of 2-aminobenzimidazole small molecules against MRSA and multidrug-resistant A. baumannii. Bioorganic & medicinal chemistry, 2010, 18, 663-674.
Hron, R. J., Koltun, S. P., Pominski, J., Abraham, G. The potential commercial aspects of gossypol. Journal of the American Oil Chemists’ Society, 1987, 64(9), 1315-1319.
In, Y. W., Kim, J. J., Kim, H. J., Oh, S. W. Antimicrobial activities of acetic acid, citric acid and lactic acid against S higella species. Journal of Food Safety, 2013, 33(1), 79-85.
Inouye, S., Watanabe, T., Kitasato, I. Comparative antimicrobial activities of ribostamycin, gentamicin, ampicillin and lincomycin in vitro and in vivo. Drugs under experimental and clinical research, 1989, 15(10), 465-476.
Ivanov, M., Kannan, A., Stojkovic, D., Glamoclija, J., Grdadolnik, S. G., Sanglard, D., Sokovic, M. Revealing the astragalin mode of anticandidal action. EXCLI journal, 2020, 19: 1436.
Jang, J. H., Kim, J. Y., Sung, E. G., Kim, E., Lee, T. J. Gambogic acid induces apoptosis and sensitizes TRAIL-mediated apoptosis through downregulation of cFLIPL in renal carcinoma Caki cells. International Journal of Oncology, 2016, 48(1), 376-384.
Kasten, M. J. Clindamycin, metronidazole, and chloramphenicol. In Mayo Clinic Proceedings. 1999, 74: 825-833.
Kaomongkolgit, R., Jamdee, K., Chaisomboon, N. Antifungal activity of alpha-mangostin against Candida albicans. Journal of oral science, 2009, 51(3), 401-406.
Khatiwora, E., Adsul, V. B., Kulkarni, M., Deshpande, N. R., Kashalkar, R. V. Antibacterial activity of Dibutyl Phthalate: A secondary metabolite isolated from Ipomoea carnea stem. J Pharm Res, 2012, 5(1), 150-152.
Kilit, A. C., Kose, E. O., Imir, N. G., Aydemir, E. Anticancer and antimicrobial activities of diosmin. Genet. Mol. Res, 2021, 20.
Kubo, I., Fujita, K. I., Lee, S. H., Ha, T. J. Antibacterial activity of polygodial. Phytotherapy Research: An International Journal Devoted to Pharmacological and Toxicological Evaluation of Natural Product Derivatives, 2005, 19(12), 1013-1017.
Lagadinou, M., Onisor, M. O., Rigas, A., Musetescu, D. V., Gkentzi, D., Assimakopoulos, S. F., et al. Antimicrobial properties on non-antibiotic drugs in the era of increased bacterial resistance. Antibiotics, 2020, 9(3), 107.
Lanciotti, R., Patrignani, F., Bagnolini, F., Guerzoni, M. E., Gardini, F. Evaluation of diacetyl antimicrobial activity against Escherichia coli, Listeria monocytogenes and Staphylococcus aureus. Food Microbiology, 2003, 20(5), 537-543.
Lavermicocca, P., Valerio, F., Visconti, A. Antifungal activity of phenyllactic acid against molds isolated from bakery products. Applied and Environmental Microbiology, 2003, 69(1), 634-640.
Lee, Y. S., Han, S. H., Lee, S. H., Kim, Y. G., Park, C. B., Kang, O. H., et al. The mechanism of antibacterial activity of tetrandrine against Staphylococcus aureus. Foodborne Pathogens and Disease, 2012, 9(8), 686-691.
Liu, P. L. A., Agbay, R. L. M. C., Castañeda, S. S. In vitro Antibacterial Activity of Mometasone Furoate, Fluticasone Propionate and Fluticasone Furoate Nasal Preparations Against Streptococcus pneumoniae, Hemophilus influenzae, Streptococcus viridans, Staphylococcus aureus, Pseudomonas aeruginosa, and Escherichia coli. Philippine Journal of Otolaryngology Head and Neck Surgery, 2010, 25(1), 13-…
Lou, Z., Wang, H., Zhu, S., Ma, C., Wang, Z. Antibacterial activity and mechanism of action of chlorogenic acid. Journal of food science, 2011, 76(6), M398-M403.
Ma, G., Khan, S. I., Jacob, M. R., Tekwani, B. L., Li, Z., Pasco, D. S., et al. Antimicrobial and antileishmanial activities of hypocrellins A and B. Antimicrobial agents and chemotherapy, 2004, 48(11), 4450-4452.
Ma, C., He, N., Zhao, Y., Xia, D., Wei, J., Kang, W. Antimicrobial mechanism of hydroquinone. Applied Biochemistry and Biotechnology, 2019, 189(4), 1291-1303.
Machan, Z. A., Taylor, G. W., Pitt, T. L., Cole, P. J., Wilson, R. 2-Heptyl-4-hydroxyquinoline N-oxide, an antistaphylococcal agent produced by Pseudomonas aeruginosa. Journal of Antimicrobial Chemotherapy, 1992, 30(5), 615-623.
Machuca, J., López-Rojas, R., Fernandez-Cuenca, F., Pascual, Á. Comparative activity of a polyhexanide–betaine solution against biofilms produced by multidrug-resistant bacteria belonging to high-risk clones. Journal of Hospital Infection, 2019, 103(1), e92-e96.
Mahmoud, Z. F. Antimicrobial components from Maclura pomifera fruit. Planta medica, 1981, 42(07), 299-301.
Malik, S., Singh, M., Mathur, A. Antimicrobial activity of food grade glucosamine. Int. J. Biotechnol. Bioeng. Res, 2013, 4(4), 307-312.
Masadeh, M. M., Mhaidat, N. M., Al-Azzam, S. I., Alzoubi, K. H. Investigation of the antibacterial activity of pioglitazone. Drug design, development and therapy, 2011, 5, 421.
Mimura, K., Baba, S. Determination of paeonol metabolites in man by the use of stable isotopes. Chemical and Pharmaceutical Bulletin, 1981, 29, 2043-2050.
Moein, M., Zomorodian, K., Almasi, M., Pakshir, K., Zarshenas, M. M. Preparation and analysis of Rosa damascena essential oil composition and antimicrobial activity assessment of related fractions. Iranian Journal of Science and Technology, Transactions A: Science, 2017, 41, 87-94.
Mokdad-Bzeouich, I., Mustapha, N., Chaabane, F., Ghedira, Z., Ghedira, K., Ghoul, M., et al. Oligomerization of esculin improves its antibacterial activity and modulates antibiotic resistance. The Journal of antibiotics, 2015, 68(3), 148-152.
Montgomery, A. B., Rhomberg, P. R., Abuan, T., Walters, K. A., Flamm, R. K. Potentiation effects of amikacin and fosfomycin against selected amikacin-nonsusceptible Gram-negative respiratory tract pathogens. Antimicrobial agents and chemotherapy, 2014, 58, 3714-3719.
Montrose, D. C., Zhou, X. K., McNally, E. M., Sue, E., Yantiss, R. K., Gross, S. S., et al. Celecoxib Alters the Intestinal Microbiota and Metabolome in Association with Reducing Polyp BurdenCelecoxib Modulates the GI Microbiota and Metabolome. Cancer Prevention Research, 2016, 9(9), 721-731.
Mortaz, E., Nomani, M., Adcock, I., Folkerts, G., Garssen, J. Galactooligosaccharides and 2′-fucosyllactose can directly suppress growth of specific pathogenic microbes and affect phagocytosis of neutrophils. Nutrition, 2022, 96, 111601.
Mladineo, I., Trumbić, Ž., Ormad-García, A., Palenzuela, O., Sitjà-Bobadilla, A., Manuguerra, S., et al. In vitro testing of alternative synthetic and natural antiparasitic compounds against the monogenean sparicotyle chrysophrii. Pathogens, 2021, 10, 980.
Murray, M. F. Nicotinamide: an oral antimicrobial agent with activity against both Mycobacterium tuberculosis and human immunodeficiency virus. Clinical infectious diseases, 2003, 36(4), 453-460.
Narui, K., Noguchi, N., Saito, A., Kakimi, K., Motomura, N., Kubo, K., et al. Anti-infectious activity of tryptophan metabolites in the L-tryptophan–L-kynurenine pathway. Biological and Pharmaceutical Bulletin, 2009, 32(1), 41-44.
Nazir, N., Koul, S., Qurishi, M. A., Najar, M. H., Zargar, M. I. Evaluation of antioxidant and antimicrobial activities of Bergenin and its derivatives obtained by chemoenzymatic synthesis. European journal of medicinal chemistry, 2011, 46(6), 2415-2420.
Ning, Y., Yan, A., Yang, K., Wang, Z., Li, X., Jia, Y. Antibacterial activity of phenyllactic acid against Listeria monocytogenes and Escherichia coli by dual mechanisms. Food Chemistry, 2017, 228, 533-540.
Nurunnabi, T. R., Al-Majmaie, S., Nakouti, I., Nahar, L., Rahman, M., Sohrab, H., et al. Antimicrobial activity of kojic acid from endophytic fungus Colletotrichum gloeosporioides isolated from Sonneratia apetala, a mangrove plant of the Sundarbans. Asian Pacific Journal of Tropical Medicine, 2018, 11(5), 350-354.
Kayathi, N. B., Sowmya, D. V., Adivireddy, P., Venkatapuram, P. Synthesis of benzazolyl pyrimidines under ultrasonication and their antimicrobial activity. Journal of Heterocyclic Chemistry, 2018, 55(4), 1024-1032.
Kawashima, Y. Effects of catechin gallate on bactericidal action and leukotoxic activity of Aggregatibacter actinomycetemcomitans. International Journal of Oral-Medical Sciences, 2011, 10, 20-24.
Kim, M. J., Da Jeong, M., Zheng, Q., Yuk, H. G. Antimicrobial activity of 405 nm light-emitting diode (LED) in the presence of riboflavin against Listeria monocytogenes on the surface of smoked salmon. Food Science and Biotechnology, 2021, 30, 609-618.
Kotan, R., Kordali, S., Cakir, A. Screening of antibacterial activities of twenty-one oxygenated monoterpenes. Zeitschrift für Naturforschung C, 2007, 62, 507-513.
Kovanda, L., Zhang, W., Wei, X., Luo, J., Wu, X., Atwill, E. R., et al. In vitro antimicrobial activities of organic acids and their derivatives on several species of gram-negative and gram-positive bacteria. Molecules, 2019, 24(20), 3770.
Ojala, T., Remes, S., Haansuu, P., Vuorela, H., Hiltunen, R., Haahtela, K., Vuorela, P. Antimicrobial activity of some coumarin containing herbal plants growing in Finland. Journal of ethnopharmacology, 2000, 73(1-2), 299-305.
Olgun, A., Kisa, O., Yildiran, S. T., Tezcan, S., Akman, S., Erbil, M. K. Antimicrobial efficacy of L-carnitine. Annals of microbiology, 2004, 54(1), 95-102.
Osman, M. E. A. H., Abo-Shady, A. M., Gaafar, R. M., El-Nagar, M. M., Ismail, G. A. Promoting Wheat Growth by Priming Grains with Aqueous Extracts of Nostoc muscorum and Arthrospira platensis. Egyptian Journal of Botany, 2021, 61, 809-821.
Ozma, M. A., Khodadadi, E., Pakdel, F., Kamounah, F. S., Yousefi, M., Yousefi, B., et al. Baicalin, a natural antimicrobial and anti-biofilm agent. Journal of Herbal Medicine, 2021, 27, 100432.
Paquet, P., Pierard, G. E. Dapsone treatment of folliculitis decalvans. In Annales de Dermatologie et de Venereologie, 2004, 131: 195-197.
Paulo, L., Ferreira, S., Gallardo, E., Queiroz, J. A., Domingues, F. Antimicrobial activity and effects of resveratrol on human pathogenic bacteria. World Journal of Microbiology and Biotechnology, 2010, 26(8), 1533-1538.
Paytubi, S., de La Cruz, M., Tormo, J. R., Martín, J., González, I., Gonzalez-Menendez, V., et al. A high-throughput screening platform of microbial natural products for the discovery of molecules with antibiofilm properties against Salmonella. Frontiers in Microbiology, 2017, 8, 326.
Pavia, C. S., Plummer, M. M. Clinical implications of nicotine as an antimicrobial agent and immune modulator. Biomedicine & Pharmacotherapy, 2020, 129, 110404.
Pj, B., Shibumon, G., Sunny, K., Cincy, G. 2, 3-dihydroxybenzoic acid: an effective antifungal agent isolated from Flacourtia inermis fruit. Int. J. Pharm. Clin. Res, 2010, 2, 101-105.
Pokharkar Raghunath, D., Funde Prasad, E., Pingale Shirish, S. Synthesis and Antibacterial Activity of 2-aminobenzamide in Presence of Thiosemicarbazide, Acetic Acid, H2SO4. Pharmacologyonline, 2008, 1: 55-61.
Qian, W., Yang, M., Wang, T., Sun, Z., Liu, M., Zhang, J., et al. Antibacterial mechanism of vanillic acid on physiological, morphological, and biofilm properties of carbapenem-resistant enterobacter hormaechei. Journal of food protection, 2020, 83(4), 576-583.
Raizner, N. T., Gedon, N. K., Zablotski, Y., Kania, S. A., Kühnle, H. F., Kühnle, C., Mueller, R. S. Epidemiological observations on pastern dermatitis in young horses and evaluation of essential fatty acid spot‐on applications with or without phytosphingosine as prophylactic treatment. Veterinary Dermatology.2022.
Raj, M. K., Duraipandiyan, V., Agustin, P., Ignacimuthu, S. Antimicrobial activity of bergenin isolated from Peltophorum pterocarpum DC. flowers. Asian Pacific Journal of Tropical Biomedicine, 2012, 2(2), S901-S904.
Riessberger-Gallé, U., Hernández-López, J., Rechberger, G., Crailsheim, K., Schuehly, W. Lysophosphatidylcholine acts in the constitutive immune defence against American foulbrood in adult honeybees. Scientific reports, 2016, 6, 1-10.
Rym, K. H., Eo, S. K., Kim, Y. S., Lee, C. K., Han, S. S. Antimicrobial activity and acute toxicity of natural rutin. Korean Journal of Pharmacognosy, 1996, 27(4), 309-315.
Sader, H. S., Castanheira, M., Farrell, D. J., Flamm, R. K., Mendes, R. E., Jones, R. N. Tigecycline antimicrobial activity tested against clinical bacteria from Latin American medical centres: results from SENTRY Antimicrobial Surveillance Program (2011–2014). International journal of antimicrobial agents, 2016, 48(2), 144-150.
Sakko, M., Moore, C., Novak‐Frazer, L., Rautemaa, V., Sorsa, T., Hietala, P., et al. 2‐hydroxyisocaproic acid is fungicidal for Candida and Aspergillus species. Mycoses, 2014, 57(4), 214-221.
Sarawaneeyaruk, S., Krajangsang, S., Pringsulaka, O. The effects of neem extract and azadirachtin on soil microorganisms. Journal of soil science and plant nutrition, 2015, 15, 1071-1083.
Schabauer, A., Zutz, C., Lung, B., Wagner, M., Rychli, K. Gentisaldehyde and its derivative 2, 3-dihydroxybenzaldehyde show antimicrobial activities against bovine mastitis Staphylococcus aureus. Frontiers in veterinary science, 2018, 5, 148.
Scott, V. R., Boehme, R., Matthews, T. R. New class of antifungal agents: jasplakinolide, a cyclodepsipeptide from the marine sponge, Jaspis species. Antimicrobial agents and chemotherapy, 1988, 32(8), 1154-1157.
Seth, P. P., Jefferson, E. A., Risen, L. M., Osgood, S. A. Identification of 2-aminobenzimidazole dimers as antibacterial agents. Bioorganic & medicinal chemistry letters, 2003, 13, 1669-1672.
Sharma, A., Gupta, S., Chauhan, S., Nair, A., Sharma, P. Astilbin: A promising unexplored compound with multidimensional medicinal and health benefits. Pharmacological Research, 2020, 158, 104894.
Shi, H., Li, J., Zhang, H., Zhang, J., Sun, H. Effect of 5-aminolevulinic acid photodynamic therapy on Candida albicans biofilms: An in vitro study. Photodiagnosis and Photodynamic Therapy, 2016, 15, 40-45.
Shin, S. Y., Bajpai, V. K., Kim, H. R., Kang, S. C. Antibacterial activity of eicosapentaenoic acid (EPA) against foodborne and food spoilage microorganisms. LWT-Food Science and Technology, 2007, 40(9), 1515-1519.
Skaff, D. A., Ramyar, K. X., McWhorter, W. J., Barta, M. L., Geisbrecht, B. V., Miziorko, H. M. Biochemical and structural basis for inhibition of Enterococcus faecalis hydroxymethylglutaryl-CoA synthase, mvaS, by hymeglusin. Biochemistry, 2012, 51(23), 4713-4722.
Stefanowicz-Hajduk, J., Hering, A., Gucwa, M., Hałasa, R., Soluch, A., Kowalczyk, M., et al. Biological activities of leaf extracts from selected Kalanchoe species and their relationship with bufadienolides content. Pharmaceutical Biology, 2020, 58(1), 732-740.
Szawarski, N., Giménez-Martínez, P., Mitton, G., Negri, P., Arcerito, F. M., Moliné, M. P., et al. Antimicrobial activity of indoleacetic, gibberellic and coumaric acids against Paenibacillus larvae and its toxicity against Apis mellifera. Spanish journal of agricultural research, 2020, 18(1), e05SC01-e05SC01.
Tally, F. P., Goldin, B. R., Sullivan, N. A. D. I. N. E., Johnston, J. U. D. I. T. H., Gorbach, S. L. Antimicrobial activity of metronidazole in anaerobic bacteria. Antimicrobial Agents and Chemotherapy, 1978, 13(3), 460-465.
Tamizh, M. M., Kesavan, D., Sivakumar, P. M., Mereiter, K., Deepa, M., Kirchner, K., et al. Antibacterial Activities of 4‐Substituted‐2‐[(E)‐{(1S, 2R)/(1R, 2S)‐1‐Hydroxy‐1‐Phenylpropan‐2‐Ylimino} Methyl] Phenol. Chemical Biology & Drug Design, 2012, 79, 177-185.
Vaghasiya, Y. K., Nair, R., Soni, M., Baluja, S., Shanda, S. Synthesis, structural determination and antibacterial activity of compounds derived from vanillin and 4-aminoantipyrine. Journal of the Serbian Chemical Society, 2004, 69, 991-998.
Vianna, M. E., Gomes, B. P., Berber, V. B., Zaia, A. A., Ferraz, C. C. R., de Souza-Filho, F. J. In vitro evaluation of the antimicrobial activity of chlorhexidine and sodium hypochlorite. Oral Surgery, Oral Medicine, Oral Pathology, Oral Radiology, and Endodontology, 2004, 97(1), 79-84.
Wang, H. X., Ng, T. B. Demonstration of antifungal and anti-human immunodeficiency virus reverse transcriptase activities of 6-methoxy-2-benzoxazolinone and antibacterial activity of the pineal indole 5-methoxyindole-3-acetic acid. Comparative Biochemistry and Physiology Part C: Toxicology & Pharmacology, 2002, 132, 261-268.
Wang, Q., Zhang, W., Li, H., Aprecio, R., Wu, W., Lin, Y., Li, Y. Effects of 25-hydroxyvitamin D3 on cathelicidin production and antibacterial function of human oral keratinocytes. Cellular immunology, 2013, 283, 45-50.
Wang, H., Zou, D., Xie, K., Xie, M. Antibacterial mechanism of fraxetin against Staphylococcus aureus. Molecular Medicine Reports, 2014, 10(5), 2341-2345.
Wang, S., Deng, H., Wang, Y., Rui, W., Zhao, P., Yong, Q.,et al. Antimicrobial Activity and Action Mechanism of Thymoquinone against Bacillus cereus and Its Spores. Foods, 2021a, 10(12), 3048.
Wang, X. J., Chen, B. Y., Yang, B. W., Yue, T. L., Guo, C. F. Chemical structure, concentration, and pH are key factors influencing antimicrobial activity of conjugated bile acids against lactobacilli. Journal of Dairy Science, 2021b, 104(2), 1524-1530.
Winkler, T., Gröger, H., Hummel, W. Enantioselective Rearrangement Coupled with Water Addition: Direct Synthesis of Enantiomerically Pure Saturated Carboxylic Acids from α, β‐Unsaturated Aldehydes. ChemCatChem, 2014, 6, 961-964.
Xu, L., She, P., Chen, L., Li, S., Zhou, L., Hussain, Z., et al. Repurposing candesartan cilexetil as antibacterial agent for mrsa infection. Frontiers in microbiology, 2021. 2587.
Yang, X., Peng, T., Yang, Y., Li, W., Xiong, J., Zhao, L., Ding, Z. Antimicrobial and antioxidant activities of a new benzamide from endophytic Streptomyces sp. YIM 67086. Natural product research, 2015, 29: 331-335.
Yang, L., Wang, Y., He, X., Xiao, Q., Han, S., Jia, Z., et al. Discovery of a novel plant-derived agent against Ralstonia solanacearum by targeting the bacterial division protein FtsZ. Pesticide Biochemistry and Physiology, 2021, 177: 104892.
Yao, X., Zhu, X., Pan, S., Fang, Y., Jiang, F., Phillips, G. O., Xu, X. Antimicrobial activity of nobiletin and tangeretin against Pseudomonas. Food Chemistry, 2012, 132(4), 1883-1890.
Yilmaz, S., Sova, M., Ergün, S. Antimicrobial activity of trans‐cinnamic acid and commonly used antibiotics against important fish pathogens and nonpathogenic isolates. Journal of Applied Microbiology, 2018, 125(6), 1714-1727.
Zhao, M., Xu, J., Qian, D., Guo, J., Jiang, S., Shang, E. X., et al. Characterization of in Vitro Metabolism of Loganin by Human Intestinal Microflora Using Ultra-High Performance Liquid Chromatography–Quadrupole Time-of-Flight Mass Spectrometry. Analytical Letters, , 2014, 47(9), 1500-1512.
